# Supplementary material
Source: publisher site journal article supplement (https://www.dovepress.com/article/466090)
Supplement: Supplementary file 1 [file get_supplementary_file.php]

Supplementary Materials

1. Difference between patients with or without manic residual symptoms

| **TableS1 Difference between patients with or without manic residual symptoms** | | | | | | | | |
| --- | --- | --- | --- | --- | --- | --- | --- | --- |
| **Characteristic** | **N** | **Overall**, N = 242a | **Without**, N = 213*a* | **With**, N = 29*a* | **p-value***b* | **Difference***b* | **95% CI***b,c* | **q-value***d* |
| **sex, n (%)** | 242 |  |  |  | 0.5 |  |  | 0.85 |
| male |  | 107 (44%) | 92 (43%) | 15 (52%) |  |  |  |  |
| female |  | 135 (56%) | 121 (57%) | 14 (48%) |  |  |  |  |
| **Marital status, n (%)** | 242 |  |  |  | 0.36 |  |  | 0.79 |
| married |  | 110 (45%) | 94 (44%) | 16 (55%) |  |  |  |  |
| single |  | 132 (55%) | 119 (56%) | 13 (45%) |  |  |  |  |
| **using double mood stabilizers, n (%)** | 242 | 66 (27%) | 57 (27%) | 9 (31%) | 0.79 |  |  | 0.94 |
| **Family history, n (%)** | 242 | 81 (33%) | 68 (32%) | 13 (45%) | 0.24 |  |  | 0.62 |
| **Type of BD(Type I), n (%)** | 242 |  |  |  | 0.5 |  |  | 0.85 |
| bipolar I disorder |  | 191 (79%) | 170 (80%) | 21 (72%) |  |  |  |  |
| bipolar II disorder |  | 51 (21%) | 43 (20%) | 8 (28%) |  |  |  |  |
| **Using antidepressant, n (%)** | 242 | 42 (17%) | 36 (17%) | 6 (21%) | 0.81 |  |  | 0.94 |
| **Physical disease, n (%)** | 242 |  |  |  | 0.17 |  |  | 0.58 |
| no |  | 195 (81%) | 174 (82%) | 21 (72%) |  |  |  |  |
| stable disease |  | 45 (19%) | 38 (18%) | 7 (24%) |  |  |  |  |
| unstable disease |  | 2 (0.8%) | 1 (0.5%) | 1 (3.4%) |  |  |  |  |
| **Working, n (%)** | 242 |  |  |  | 0.061 |  |  | 0.35 |
| employed |  | 178 (74%) | 152 (71%) | 26 (90%) |  |  |  |  |
| no job |  | 64 (26%) | 61 (29%) | 3 (10%) |  |  |  |  |
| **ITAQDegree, n (%)** | 242 | 204 (84%) | 182 (85%) | 22 (76%) | 0.29 |  |  | 0.69 |
| **bprsDegree, n (%)** | 242 | 2 (0.8%) | 1 (0.5%) | 1 (3.4%) | 0.57 |  |  | 0.87 |
| **Age, Mean(SD)** | 242 | 35(12) | 35(12) | 35(12) | 0.87 | -0.39 | -5.0, 4.2 | 0.94 |
| **Years of education, Mean(SD)** | 242 | 13.6(3.3) | 13.6(3.4) | 13.3(3.0) | 0.59 | 0.33 | -0.88, 1.5 | 0.87 |
| **Age of first onset,, Mean(SD)** | 242 | 25(9) | 25(10) | 24(9) | 0.94 | 0.12 | -3.4, 3.7 | 0.98 |
| **Total course of illness, Mean(SD)** | 242 | 9(7) | 9(7) | 10(8) | 0.52 | -1 | -4.2, 2.2 | 0.85 |
| **Total number of episodes, Mean(SD)** | 241 | 5.37(4.00) | 5.35(3.59) | 5.54(6.43) | 0.88 | -0.19 | -2.7, 2.3 | 0.94 |
| (Missing) |  | 1 | 0 | 1 |  |  |  |  |
| **Time from first onset to diagnosis, Mean(SD)** | 241 | 5.6(6.4) | 5.3(6.2) | 7.3(7.9) | 0.21 | -2 | -5.1, 1.2 | 0.62 |
| (Missing) |  | 1 | 0 | 1 |  |  |  |  |
| **Age of initial diagnosis, Mean(SD)** | 240 | 30(11) | 30(11) | 31(10) | 0.65 | -0.98 | -5.3, 3.4 | 0.88 |
| (Missing) |  | 2 | 0 | 2 |  |  |  |  |
| **Time from diagnosis to first treatment, Mean(SD)** | 241 | 3.2(5.2) | 3.2(5.0) | 3.8(6.3) | 0.64 | -0.59 | -3.1, 1.9 | 0.88 |
| (Missing) |  | 1 | 0 | 1 |  |  |  |  |
| **Total number of times in hospital, Mean(SD)** | 242 | 2.62(2.41) | 2.62(2.30) | 2.62(3.14) | >0.99 | 0 | -1.2, 1.2 | >0.99 |
| **HAMDSum, Mean(SD)** | 242 | 3.2(3.4) | 3.2(3.3) | 3.3(3.9) | 0.86 | -0.14 | -1.7, 1.4 | 0.94 |
| **YMRSSum, Mean(SD)** | 241 | 1.63(2.42) | 1.43(2.24) | 3.14(3.11) | 0.008 | -1.7 | -3.0, -0.48 | 0.064 |
| (Missing) |  | 1 | 0 | 1 |  |  |  |  |
| **ITAQSum, Mean(SD)** | 242 | 17.2(4.3) | 17.2(4.3) | 17.0(4.1) | 0.85 | 0.15 | -1.5, 1.8 | 0.94 |
| **BPRSSum, Mean(SD)** | 242 | 20.93(4.68) | 20.68(4.47) | 22.76(5.72) | 0.068 | -2.1 | -4.3, 0.17 | 0.35 |
| **MDQFactor1, Mean(SD)** | 242 | 1.70(1.80) | 1.29(1.39) | 4.72(1.65) | <0.001 | -3.4 | -4.1, -2.8 | <0.001 |
| **MDQFactor2, Mean(SD)** | 242 | 0.73(1.51) | 0.36(0.65) | 3.41(2.82) | <0.001 | -3.1 | -4.1, -2.0 | <0.001 |
| **MDQFactor3, Mean(SD)** | 242 | 0.83(1.01) | 0.59(0.69) | 2.59(1.24) | <0.001 | -2 | -2.5, -1.5 | <0.001 |
| **QIDSSum, Mean(SD)** | 241 | 6.6(4.9) | 6.5(4.9) | 7.3(5.0) | 0.41 | -0.81 | -2.8, 1.2 | 0.85 |
| (Missing) |  | 1 | 1 | 0 |  |  |  |  |
| **WHOQOLPHYS, Mean(SD)** | 242 | 13.22(1.99) | 13.30(1.99) | 12.63(1.95) | 0.093 | 0.67 | -0.12, 1.4 | 0.41 |
| **WHOQOLPSYCH, Mean(SD)** | 242 | 14.02(2.67) | 14.09(2.68) | 13.45(2.64) | 0.22 | 0.65 | -0.41, 1.7 | 0.62 |
| **WHOQOLSOCIL, Mean(SD)** | 242 | 13.70(2.65) | 13.80(2.64) | 13.01(2.71) | 0.15 | 0.79 | -0.30, 1.9 | 0.58 |
| **WHOQOLENVIR, Mean(SD)** | 242 | 13.78(2.24) | 13.82(2.23) | 13.47(2.33) | 0.44 | 0.36 | -0.57, 1.3 | 0.85 |
| *a* Median (SD) OR n(Frequency) | | | | | | | | |
| *b* Pearson’s Chi-squared test; Welch Two Sample t-test | | | | | | | | |
| *c* CI = Confidence Interval | | | | | | | | |
| *d* False discovery rate correction for multiple testing | | | | | | | | |

2. Difference between patients with or without depression residual symptoms

| **Table S2 Difference between patients with or without depression residual symptoms** | | | | | | | | |
| --- | --- | --- | --- | --- | --- | --- | --- | --- |
| **Characteristic** | **N** | **Overall**, N = 241*a* | **Without**, N = 130*a* | **With**, N = 111*a* | **p-value***b* | **Difference***b* | **95% CI***b,c* | **q-value***d* |
| **sex, n (%)** | 241 |  |  |  | 0.47 |  |  | 0.69 |
| male |  | 107 (44%) | 61 (47%) | 46 (41%) |  |  |  |  |
| female |  | 134 (56%) | 69 (53%) | 65 (59%) |  |  |  |  |
| **Marital status, n (%)** | 241 |  |  |  | 0.94 |  |  | 0.94 |
| married |  | 109 (45%) | 58 (45%) | 51 (46%) |  |  |  |  |
| single |  | 132 (55%) | 72 (55%) | 60 (54%) |  |  |  |  |
| **using double mood stabilizers, n (%)** | 241 | 66 (27%) | 37 (28%) | 29 (26%) | 0.79 |  |  | 0.82 |
| **Family history, n (%)** | 241 | 80 (33%) | 46 (35%) | 34 (31%) | 0.52 |  |  | 0.7 |
| **Type of BD(Type I), n (%)** | 241 |  |  |  | 0.75 |  |  | 0.82 |
| bipolar I disorder |  | 190 (79%) | 104 (80%) | 86 (77%) |  |  |  |  |
| bipolar II disorder |  | 51 (21%) | 26 (20%) | 25 (23%) |  |  |  |  |
| **Using antidepressant, n (%)** | 241 | 42 (17%) | 20 (15%) | 22 (20%) | 0.46 |  |  | 0.69 |
| **Physical disease, n (%)** | 241 |  |  |  | 0.74 |  |  | 0.82 |
| no |  | 194 (80%) | 107 (82%) | 87 (78%) |  |  |  |  |
| stable disease |  | 45 (19%) | 22 (17%) | 23 (21%) |  |  |  |  |
| unstable disease |  | 2 (0.8%) | 1 (0.8%) | 1 (0.9%) |  |  |  |  |
| **Working, n (%)** | 241 |  |  |  | 0.77 |  |  | 0.82 |
| employed |  | 177 (73%) | 94 (72%) | 83 (75%) |  |  |  |  |
| no job |  | 64 (27%) | 36 (28%) | 28 (25%) |  |  |  |  |
| **ITAQDegree, n (%)** | 241 | 203 (84%) | 111 (85%) | 92 (83%) | 0.72 |  |  | 0.82 |
| **bprsDegree, n (%)** | 241 | 2 (0.8%) | 0 (0%) | 2 (1.8%) | 0.41 |  |  | 0.67 |
| **Age, Mean(SD)** | 241 | 35(12) | 36(12) | 33(10) | 0.012 | 3.7 | 0.82, 6.6 | 0.043 |
| **Years of education, Mean(SD)** | 241 | 13.6(3.4) | 13.7(3.5) | 13.4(3.2) | 0.51 | 0.28 | -0.57, 1.1 | 0.7 |
| **Age of first onset,, Mean(SD)** | 241 | 25(9) | 25(10) | 24(9) | 0.18 | 1.6 | -0.76, 4.0 | 0.37 |
| **Total course of illness, Mean(SD)** | 241 | 9(7) | 10(8) | 8(6) | 0.022 | 2.1 | 0.31, 3.9 | 0.061 |
| **Total number of episodes, Mean(SD)** | 240 | 5.37(4.01) | 5.49(3.64) | 5.23(4.42) | 0.62 | 0.26 | -0.78, 1.3 | 0.77 |
| (Missing) |  | 1 | 1 | 0 |  |  |  |  |
| **Time from first onset to diagnosis, Mean(SD)** | 240 | 5.6(6.4) | 6.2(7.2) | 4.8(5.3) | 0.076 | 1.4 | -0.15, 3.0 | 0.18 |
| (Missing) |  | 1 | 1 | 0 |  |  |  |  |
| **Age of initial diagnosis, Mean(SD)** | 239 | 30(11) | 32(12) | 29(10) | 0.064 | 2.6 | -0.16, 5.4 | 0.17 |
| (Missing) |  | 2 | 2 | 0 |  |  |  |  |
| **Time from diagnosis to first treatment, Mean(SD)** | 240 | 3.2(5.2) | 3.9(5.7) | 2.4(4.4) | 0.02 | 1.5 | 0.25, 2.8 | 0.061 |
| (Missing) |  | 1 | 1 | 0 |  |  |  |  |
| **Total number of times in hospital, Mean(SD)** | 241 | 2.63(2.41) | 2.77(2.60) | 2.46(2.17) | 0.31 | 0.31 | -0.30, 0.92 | 0.54 |
| **HAMDSum, Mean(SD)** | 241 | 3.2(3.4) | 1.7(2.2) | 4.9(3.7) | <0.001 | -3.2 | -4.0, -2.4 | <0.001 |
| **YMRSSum, Mean(SD)** | 240 | 1.63(2.42) | 1.71(2.52) | 1.55(2.30) | 0.62 | 0.16 | -0.46, 0.77 | 0.77 |
| (Missing) |  | 1 | 1 | 0 |  |  |  |  |
| **ITAQSum, Mean(SD)** | 241 | 17.1(4.3) | 17.4(4.3) | 16.8(4.2) | 0.26 | 0.63 | -0.46, 1.7 | 0.49 |
| **BPRSSum, Mean(SD)** | 241 | 20.9(4.7) | 20.2(2.9) | 21.8(6.0) | 0.013 | -1.6 | -2.8, -0.34 | 0.043 |
| **MDQFactor1, Mean(SD)** | 241 | 1.71(1.81) | 1.82(1.88) | 1.57(1.71) | 0.27 | 0.26 | -0.20, 0.71 | 0.49 |
| **MDQFactor2, Mean(SD)** | 241 | 0.73(1.51) | 0.58(1.57) | 0.91(1.42) | 0.086 | -0.33 | -0.71, 0.05 | 0.19 |
| **MDQFactor3, Mean(SD)** | 241 | 0.83(1.01) | 0.66(1.06) | 1.03(0.92) | 0.005 | -0.37 | -0.62, -0.11 | 0.02 |
| **QIDSSum, Mean(SD)** | 241 | 6.6(4.9) | 2.9(1.6) | 10.8(4.0) | <0.001 | -7.9 | -8.7, -7.1 | <0.001 |
| **WHOQOLPHYS, Mean(SD)** | 241 | 13.22(1.99) | 14.03(1.62) | 12.27(1.98) | <0.001 | 1.8 | 1.3, 2.2 | <0.001 |
| **WHOQOLPSYCH, Mean(SD)** | 241 | 14.02(2.68) | 15.29(1.96) | 12.53(2.65) | <0.001 | 2.8 | 2.2, 3.4 | <0.001 |
| **WHOQOLSOCIL, Mean(SD)** | 241 | 13.70(2.66) | 14.71(2.18) | 12.52(2.69) | <0.001 | 2.2 | 1.6, 2.8 | <0.001 |
| **WHOQOLENVIR, Mean(SD)** | 241 | 13.78(2.24) | 14.53(2.01) | 12.91(2.18) | <0.001 | 1.6 | 1.1, 2.2 | <0.001 |
| a Median (SD) OR n(Frequency) | | | | | | | | |
| *b* Pearson’s Chi-squared test; Welch Two Sample t-test | | | | | | | | |
| *c* CI = Confidence Interval | | | | | | | | |
| *d* False discovery rate correction for multiple testing | | | | | | | | |

3. Network differences in patients with or without residual symptom

**Table S3-1 Edge invariance test between networks in patients with or without residual symptom**

| Var1 | Var2 | p-value | statistic | Var1 | Var2 | p-value | statistic | Var1 | Var2 | p-value | statistic |
| --- | --- | --- | --- | --- | --- | --- | --- | --- | --- | --- | --- |
| HAMD | YMRS | 1.000 | 0.000 | YMRS | QIDS | 1.000 | 0.000 | PHYS | PSYCH | 0.314 | 0.097 |
| HAMD | ITAQ | 1.000 | 0.000 | ITAQ | QIDS | 1.000 | 0.000 | HAMD | SOCIL | 0.142 | 0.085 |
| YMRS | ITAQ | 0.976 | 0.004 | BPRS | QIDS | 1.000 | 0.000 | YMRS | SOCIL | 1.000 | 0.000 |
| HAMD | BPRS | 0.077 | 0.156 | MDQ1 | QIDS | 0.001 | 0.129 | ITAQ | SOCIL | 1.000 | 0.000 |
| YMRS | BPRS | 0.863 | 0.027 | MDQ2 | QIDS | 1.000 | 0.000 | BPRS | SOCIL | 1.000 | 0.000 |
| ITAQ | BPRS | 1.000 | 0.000 | MDQ3 | QIDS | 1.000 | 0.000 | MDQ1 | SOCIL | 1.000 | 0.000 |
| HAMD | MDQ1 | 1.000 | 0.000 | HAMD | PHYS | 0.186 | 0.144 | MDQ2 | SOCIL | 1.000 | 0.000 |
| YMRS | MDQ1 | 0.464 | 0.099 | YMRS | PHYS | 1.000 | 0.000 | MDQ3 | SOCIL | 1.000 | 0.000 |
| ITAQ | MDQ1 | 1.000 | 0.000 | ITAQ | PHYS | 0.134 | 0.011 | QIDS | SOCIL | 0.582 | 0.052 |
| BPRS | MDQ1 | 1.000 | 0.000 | BPRS | PHYS | 1.000 | 0.000 | PHYS | SOCIL | 0.711 | 0.045 |
| HAMD | MDQ2 | 1.000 | 0.000 | MDQ1 | PHYS | 1.000 | 0.000 | PSYCH | SOCIL | 0.281 | 0.101 |
| YMRS | MDQ2 | 1.000 | 0.000 | MDQ2 | PHYS | 1.000 | 0.000 | HAMD | ENVIR | 1.000 | 0.000 |
| ITAQ | MDQ2 | 1.000 | 0.000 | MDQ3 | PHYS | 1.000 | 0.000 | YMRS | ENVIR | 1.000 | 0.000 |
| BPRS | MDQ2 | 1.000 | 0.000 | QIDS | PHYS | 0.102 | 0.153 | ITAQ | ENVIR | 1.000 | 0.000 |
| MDQ1 | MDQ2 | 0.011 | 0.299 | HAMD | PSYCH | 0.055 | 0.166 | BPRS | ENVIR | 1.000 | 0.000 |
| HAMD | MDQ3 | 1.000 | 0.000 | YMRS | PSYCH | 1.000 | 0.000 | MDQ1 | ENVIR | 1.000 | 0.000 |
| YMRS | MDQ3 | 1.000 | 0.000 | ITAQ | PSYCH | 1.000 | 0.000 | MDQ2 | ENVIR | 1.000 | 0.000 |
| ITAQ | MDQ3 | 1.000 | 0.000 | BPRS | PSYCH | 1.000 | 0.000 | MDQ3 | ENVIR | 1.000 | 0.000 |
| BPRS | MDQ3 | 1.000 | 0.000 | MDQ1 | PSYCH | 1.000 | 0.000 | QIDS | ENVIR | 0.517 | 0.061 |
| MDQ1 | MDQ3 | 0.067 | 0.232 | MDQ2 | PSYCH | 1.000 | 0.000 | PHYS | ENVIR | 0.059 | 0.214 |
| MDQ2 | MDQ3 | 0.023 | 0.400 | MDQ3 | PSYCH | 1.000 | 0.000 | PSYCH | ENVIR | 0.485 | 0.065 |
| HAMD | QIDS | 0.031 | 0.216 | QIDS | PSYCH | 0.073 | 0.182 | SOCIL | ENVIR | 0.463 | 0.085 |

**Table S3-2 Centrality invariance test between networks in patients with or without residual symptom**

|  | strength | | expected Influence | | closeness | | betweenness | |
| --- | --- | --- | --- | --- | --- | --- | --- | --- |
|  | statstic | p | statistic | p | statistic | p | statistic | p |
| HAMD | 0.768 | 0.001 | -0.023 | 0.901 | -0.006 | 0.044 | 18 | 0.122 |
| YMRS | 0.075 | 0.812 | 0.067 | 0.785 | -0.014 | NA | 8 | 0.467 |
| ITAQ | 0.015 | 0.942 | -0.015 | 0.914 | -0.007 | NA | 0 | 1.000 |
| BPRS | 0.129 | 0.587 | 0.129 | 0.599 | -0.013 | 0.001 | 10 | 0.437 |
| MDQ1 | 0.758 | 0.003 | 0.500 | 0.031 | NA | NA | 18 | 0.040 |
| MDQ2 | 0.698 | 0.005 | 0.698 | 0.004 | NA | NA | 0 | 1.000 |
| MDQ3 | 0.632 | 0.017 | 0.632 | 0.006 | NA | NA | 0 | 1.000 |
| QIDS | 0.794 | 0.001 | -0.361 | 0.076 | NA | NA | 18 | 0.271 |
| PHYS | 0.145 | 0.458 | -0.471 | 0.033 | NA | NA | 0 | 1.000 |
| PSYCH | 0.481 | 0.003 | -0.215 | 0.265 | NA | NA | 17 | 0.065 |
| SOCIL | 0.278 | 0.112 | 0.002 | 0.992 | NA | NA | 0 | 1.000 |
| ENVIR | -0.133 | 0.505 | -0.254 | 0.195 | NA | NA | -1 | 0.881 |

4. Network differences in patients with or without depressive residual symptom

**Table S4-1 Edge invariance test between networks in patients with or without depressive residual symptom**

| Var1 | Var2 | p-value | statistic | Var1 | Var2 | p-value | statistic | Var1 | Var2 | p-value | statistic |
| --- | --- | --- | --- | --- | --- | --- | --- | --- | --- | --- | --- |
| HAMD | YMRS | 0.037 | 0.069 | YMRS | QIDS | 1.000 | 0.000 | PHYS | PSYCH | 0.530 | 0.060 |
| HAMD | ITAQ | 1.000 | 0.000 | ITAQ | QIDS | 1.000 | 0.000 | HAMD | SOCIL | 0.123 | 0.088 |
| YMRS | ITAQ | 0.538 | 0.092 | BPRS | QIDS | 1.000 | 0.000 | YMRS | SOCIL | 1.000 | 0.000 |
| HAMD | BPRS | 0.900 | 0.011 | MDQ1 | QIDS | 1.000 | 0.000 | ITAQ | SOCIL | 1.000 | 0.000 |
| YMRS | BPRS | 0.178 | 0.199 | MDQ2 | QIDS | 1.000 | 0.000 | BPRS | SOCIL | 1.000 | 0.000 |
| ITAQ | BPRS | 1.000 | 0.000 | MDQ3 | QIDS | 1.000 | 0.000 | MDQ1 | SOCIL | 1.000 | 0.000 |
| HAMD | MDQ1 | 1.000 | 0.000 | HAMD | PHYS | 0.369 | 0.097 | MDQ2 | SOCIL | 1.000 | 0.000 |
| YMRS | MDQ1 | 0.767 | 0.042 | YMRS | PHYS | 1.000 | 0.000 | MDQ3 | SOCIL | 1.000 | 0.000 |
| ITAQ | MDQ1 | 1.000 | 0.000 | ITAQ | PHYS | 1.000 | 0.000 | QIDS | SOCIL | 0.725 | 0.030 |
| BPRS | MDQ1 | 1.000 | 0.000 | BPRS | PHYS | 1.000 | 0.000 | PHYS | SOCIL | 0.147 | 0.161 |
| HAMD | MDQ2 | 1.000 | 0.000 | MDQ1 | PHYS | 1.000 | 0.000 | PSYCH | SOCIL | 0.308 | 0.094 |
| YMRS | MDQ2 | 1.000 | 0.000 | MDQ2 | PHYS | 1.000 | 0.000 | HAMD | ENVIR | 1.000 | 0.000 |
| ITAQ | MDQ2 | 1.000 | 0.000 | MDQ3 | PHYS | 1.000 | 0.000 | YMRS | ENVIR | 1.000 | 0.000 |
| BPRS | MDQ2 | 1.000 | 0.000 | QIDS | PHYS | 0.236 | 0.112 | ITAQ | ENVIR | 0.809 | 0.029 |
| MDQ1 | MDQ2 | 0.792 | 0.029 | HAMD | PSYCH | 0.120 | 0.139 | BPRS | ENVIR | 1.000 | 0.000 |
| HAMD | MDQ3 | 1.000 | 0.000 | YMRS | PSYCH | 1.000 | 0.000 | MDQ1 | ENVIR | 1.000 | 0.000 |
| YMRS | MDQ3 | 0.476 | 0.047 | ITAQ | PSYCH | 1.000 | 0.000 | MDQ2 | ENVIR | 1.000 | 0.000 |
| ITAQ | MDQ3 | 1.000 | 0.000 | BPRS | PSYCH | 1.000 | 0.000 | MDQ3 | ENVIR | 1.000 | 0.000 |
| BPRS | MDQ3 | 1.000 | 0.000 | MDQ1 | PSYCH | 1.000 | 0.000 | QIDS | ENVIR | 1.000 | 0.000 |
| MDQ1 | MDQ3 | 0.212 | 0.150 | MDQ2 | PSYCH | 1.000 | 0.000 | PHYS | ENVIR | 0.032 | 0.244 |
| MDQ2 | MDQ3 | 0.379 | 0.133 | MDQ3 | PSYCH | 1.000 | 0.000 | PSYCH | ENVIR | 0.054 | 0.175 |
| HAMD | QIDS | 0.176 | 0.140 | QIDS | PSYCH | 0.137 | 0.155 | SOCIL | ENVIR | 0.603 | 0.062 |

**Table S4-2 Centrality invariance test between networks in patients with or without residual symptom**

|  | strength | | expected Influence | | closeness | | betweenness | |
| --- | --- | --- | --- | --- | --- | --- | --- | --- |
|  | statstic | p | statistic | p | statistic | p | statistic | p |
| HAMD | 0.407 | 0.029 | -0.243 | 0.249 | 0.010 | 0.018 | -20 | 0.068 |
| YMRS | -0.448 | 0.161 | -0.264 | 0.309 | 0.001 | NA | -27 | 0.039 |
| ITAQ | -0.121 | 0.608 | 0.063 | 0.725 | NA | NA | 0 | 1.000 |
| BPRS | -0.188 | 0.384 | -0.188 | 0.428 | 0.007 | 0.009 | -20 | 0.158 |
| MDQ1 | -0.163 | 0.484 | -0.163 | 0.467 | NA | NA | 0 | 1.000 |
| MDQ2 | -0.104 | 0.636 | -0.104 | 0.649 | NA | NA | 1 | 0.859 |
| MDQ3 | -0.330 | 0.194 | -0.330 | 0.150 | NA | NA | -9 | 0.467 |
| QIDS | 0.437 | 0.014 | -0.157 | 0.445 | 0.010 | 0.017 | 0 | 1.000 |
| PHYS | -0.136 | 0.504 | -0.555 | 0.018 | 0.009 | 0.019 | -21 | 0.025 |
| PSYCH | 0.274 | 0.104 | -0.315 | 0.101 | 0.011 | 0.020 | 6 | 0.535 |
| SOCIL | 0.113 | 0.498 | -0.124 | 0.502 | 0.008 | 0.020 | 0 | 1.000 |
| ENVIR | -0.386 | 0.050 | -0.386 | 0.053 | 0.006 | 0.022 | -11 | 0.037 |

5. Subgroup analysis

5.1 Female

The differences between female patients with or without residual symptoms are shown in Table S5-1. And only the female patiens with residual symptoms constructed the symptom network (Figure S1).

| **Table S5-1 Difference between female patients with or without residual symptoms** | | | | | | | | |
| --- | --- | --- | --- | --- | --- | --- | --- | --- |
| **Characteristic** | **N** | **Overall**, N = 134a | **Without**, N = 63a | **With**, N = 71*a* | **p-value***b* | **Difference***b* | **95% CI***b,c* | **q-value***d* |
| **Marital status, n (%)** | 134 |  |  |  | 0.84 |  |  | 0.97 |
| married |  | 64.00 (47.76%) | 29.00 (46.03%) | 35.00 (49.30%) |  |  |  |  |
| Single |  | 70.00 (52.24%) | 34.00 (53.97%) | 36.00 (50.70%) |  |  |  |  |
| **using double mood stabilizers, n (%)** | 134 | 31.00 (23.13%) | 15.00 (23.81%) | 16.00 (22.54%) | >0.99 |  |  | >0.99 |
|  |  |  |  |  | 0.61 |  |  | 0.89 |
| **Family history, n (%)** | 134 | 47.00 (35.07%) | 24.00 (38.10%) | 23.00 (32.39%) | 0.61 |  |  | 0.89 |
| **Type of BD(Type I), n (%)** | 134 | 99.00 (73.88%) | 45.00 (71.43%) | 54.00 (76.06%) | 0.68 |  |  | 0.90 |
| **Using antidepressant, n (%)** | 134 | 28.00 (20.90%) | 15.00 (23.81%) | 13.00 (18.31%) | 0.57 |  |  | 0.87 |
| **Physical disease, n (%)** | 134 |  |  |  | 0.40 |  |  | 0.69 |
| no |  | 105.00 (78.36%) | 52.00 (82.54%) | 53.00 (74.65%) |  |  |  |  |
| stable disease |  |  |  |  |  |  |  |  |
| unstable disease |  | 1.00 (0.75%) | 0.00 (0.00%) | 1.00 (1.41%) |  |  |  |  |
| **Working, n (%)** | 134 |  |  |  | 0.029 |  |  | 0.078 |
| employed |  | 98.00 (73.13%) | 40.00 (63.49%) | 58.00 (81.69%) |  |  |  |  |
| no job |  | 36.00 (26.87%) | 23.00 (36.51%) | 13.00 (18.31%) |  |  |  |  |
| **ITAQDegree, n (%)** | 134 | 117.00 (87.31%) | 55.00 (87.30%) | 62.00 (87.32%) | >0.99 |  |  | >0.99 |
| **bprsDegree, n (%)** | 134 | 0.00 (0.00%) | 0.00 (0.00%) | 0.00 (0.00%) |  |  |  |  |
| **Age, Mean(SD)** | 134 | 34.37(11.24) | 35.90(12.51) | 33.01(9.88) | 0.14 | 2.9 | -1.0, 6.8 | 0.31 |
| **Years of education, Mean(SD)** | 134 | 13.95(3.21) | 13.87(3.39) | 14.01(3.06) | 0.80 | -0.14 | -1.2, 0.97 | 0.97 |
| **Age of first onset,, Mean(SD)** | 134 | 23.81(8.65) | 24.38(9.33) | 23.31(8.03) | 0.48 | 1.1 | -1.9, 4.1 | 0.77 |
| **Total course of illness, Mean(SD)** | 134 | 8.76(6.81) | 9.52(7.99) | 8.10(5.54) | 0.24 | 1.4 | -0.96, 3.8 | 0.45 |
| **Total number of episodes, Mean(SD)** | 134 | 5.86(4.50) | 5.87(4.05) | 5.85(4.89) | 0.97 | 0.03 | -1.5, 1.6 | >0.99 |
| **Time from first onset to diagnosis, Mean(SD)** | 134 | 5.97(6.65) | 6.68(7.55) | 5.33(5.71) | 0.25 | 1.4 | -0.96, 3.7 | 0.45 |
| **Age of initial diagnosis, Mean(SD)** | 133 | 30.13(10.57) | 31.54(11.61) | 28.87(9.44) | 0.15 | 2.7 | -0.99, 6.3 | 0.31 |
| (Missing) |  | 1 | 0 | 1 |  |  |  |  |
| **Time from diagnosis to first treatment, Mean(SD)** | 134 | 3.18(5.18) | 4.12(5.89) | 2.35(4.33) | 0.053 | 1.8 | -0.02, 3.6 | 0.13 |
| **Total number of times in hospital, Mean(SD)** | 134 | 2.61(2.40) | 2.59(2.07) | 2.63(2.68) | 0.91 | -0.05 | -0.86, 0.77 | >0.99 |
| **HAMDSum, Mean(SD)** | 134 | 3.26(3.39) | 1.83(2.40) | 4.54(3.64) | <0.001 | -2.7 | -3.8, -1.7 | <0.001 |
| **YMRSSum, n (%)** | 134 | 1.16(1.83) | 1.10(1.74) | 1.24 (1.93) | 0.80 | -0.14 | -0.8,0.5 | 0.97 |
| **ITAQSum, Mean(SD)** | 134 | 17.34(4.25) | 17.51(4.63) | 17.18(3.91) | 0.66 | 0.32 | -1.1, 1.8 | 0.90 |
| **BPRSSum, Mean(SD)** | 134 | 19.88(2.24) | 19.22(1.65) | 20.46(2.53) | <0.001 | -1.2 | -2.0, -0.52 | 0.003 |
| **MDQFactor1, Mean(SD)** | 134 | 1.72(1.80) | 1.35(1.47) | 2.06(2.01) | 0.021 | -0.71 | -1.3, -0.11 | 0.060 |
| **MDQFactor2, Mean(SD)** | 134 | 0.67(1.57) | 0.13(0.38) | 1.15(2.01) | <0.001 | -1.0 | -1.5, -0.54 | <0.001 |
| **MDQFactor3, Mean(SD)** | 134 | 0.79(1.04) | 0.44(0.69) | 1.10(1.20) | <0.001 | -0.65 | -0.98, -0.32 | <0.001 |
| **QIDSSum, Mean(SD)** | 134 | 6.85(4.87) | 3.19(1.38) | 10.10(4.54) | <0.001 | -6.9 | -8.0, -5.8 | <0.001 |
| **WHOQOLPHYS, Mean(SD)** | 134 | 13.19(1.94) | 14.00(1.49) | 12.47(2.03) | <0.001 | 1.5 | 0.92, 2.1 | <0.001 |
| **WHOQOLPSYCH, Mean(SD)** | 134 | 13.96(2.61) | 15.25(2.13) | 12.81(2.47) | <0.001 | 2.4 | 1.7, 3.2 | <0.001 |
| **WHOQOLSOCIL, Mean(SD)** | 134 | 13.78(2.37) | 14.65(1.98) | 13.01(2.44) | <0.001 | 1.6 | 0.87, 2.4 | <0.001 |
| **WHOQOLENVIR, Mean(SD)** | 134 | 13.80(2.13) | 14.47(1.92) | 13.20(2.13) | <0.001 | 1.3 | 0.57, 2.0 | 0.002 |
| a Median (SD) OR n(Frequency) | | | | | | | | |
| bPearson’s Chi-squared test; Welch Two Sample t-test | | | | | | | | |
| c CI = Confidence Interval | | | | | | | | |
| d False discovery rate correction for multiple testing | | | | | | | | |


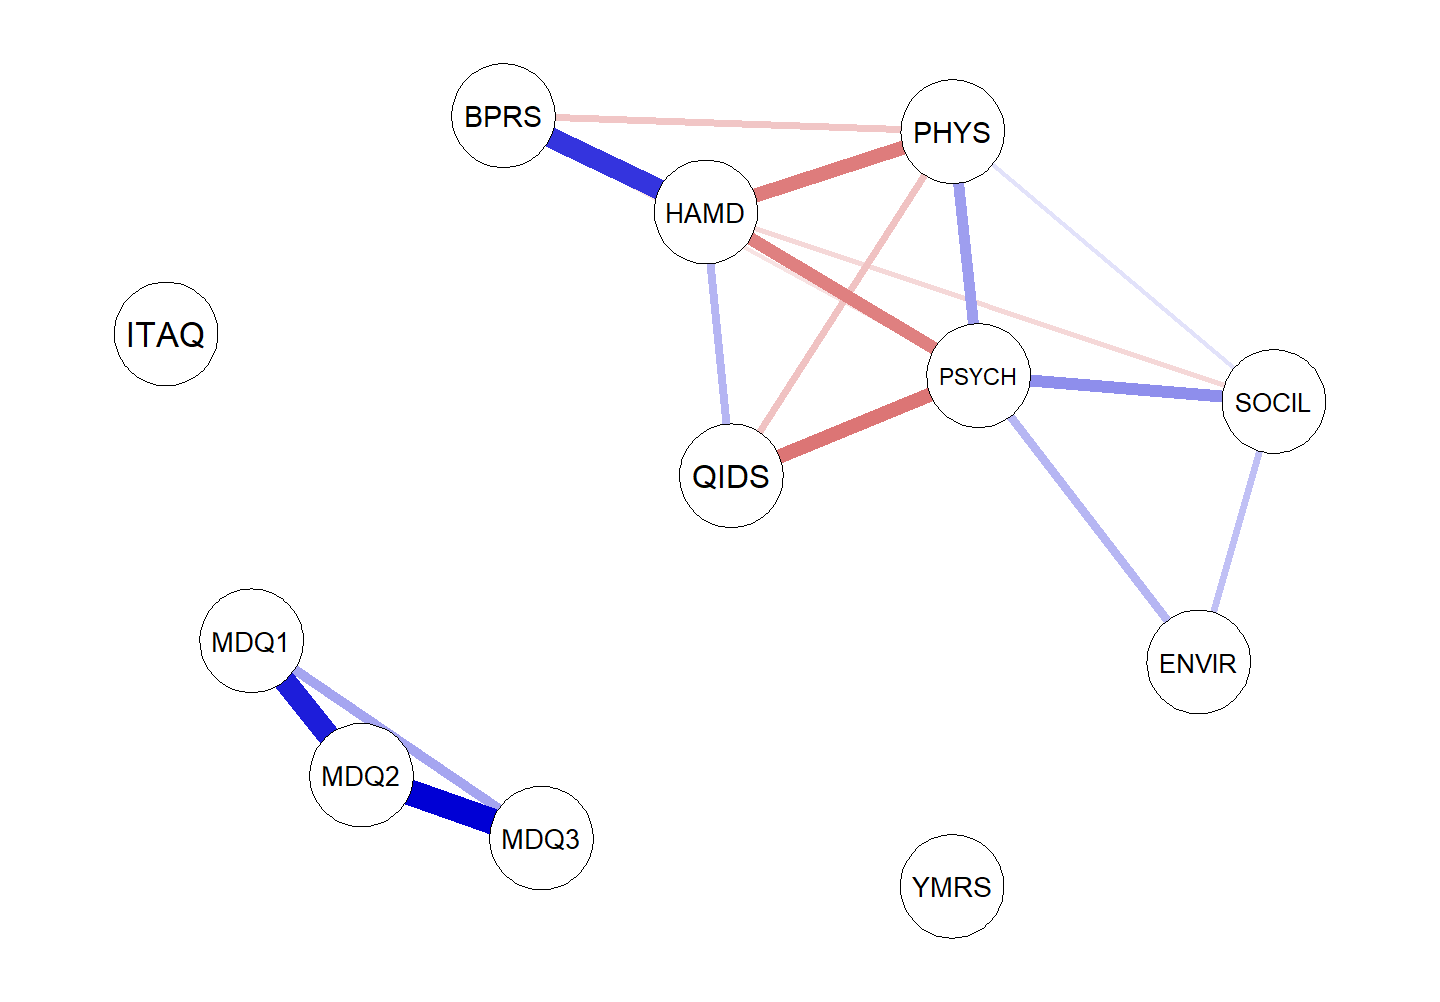


Figure S1 Symptom network in female patients with residual symptoms

5.2 Male

The differences between female patients with or without residual symptoms are shown in Table S5-2. However, neither the female patients with or without residual symptoms constructed the symptom network.

| **TableS5-2 Difference between male patients with or without residual symptoms** | | | | | | | | |
| --- | --- | --- | --- | --- | --- | --- | --- | --- |
| **Characteristic** | **N** | **Overall**, N = 107*a* | **Without**, N = 54*a* | **With**, N = 53*a* | **p-value***b* | **Difference***b* | **95% CI***b,c* | **q-value***d* |
| **Marital status, n (%)** | 107 |  |  |  | 0.64 |  |  | 0.66 |
| married |  | 45.00 (42.06%) | 21.00 (38.89%) | 24.00 (45.28%) |  |  |  |  |
| single |  | 62.00 (57.94%) | 33.00 (61.11%) | 29.00 (54.72%) |  |  |  |  |
| **using double mood stabilizers, n (%)** | 107 | 35.00 (32.71%) | 17.00 (31.48%) | 18.00 (33.96%) | 0.95 |  |  | 0.95 |
| **Family history, n (%)** | 107 | 33.00 (30.84%) | 15.00 (27.78%) | 18.00 (33.96%) | 0.63 |  |  | 0.66 |
| **Type of BD(Type I), n (%)** | 107 | 91.00 (85.05%) | 48.00 (88.89%) | 43.00 (81.13%) | 0.39 |  |  | 0.51 |
| **Using antidepressant, n (%)** | 107 | 14.00 (13.08%) | 3.00 (5.56%) | 11.00 (20.75%) | 0.041 |  |  | 0.14 |
| **Physical disease, n (%)** | 107 |  |  |  | 0.25 |  |  | 0.44 |
| no |  | 89.00 (83.18%) | 47.00 (87.04%) | 42.00 (79.25%) |  |  |  |  |
| stable disease |  | 17.00 (15.89%) | 6.00 (11.11%) | 11.00 (20.75%) |  |  |  |  |
| unstable disease |  | 1.00 (0.93%) | 1.00 (1.85%) | 0.00 (0.00%) |  |  |  |  |
| **Working, n (%)** | 107 |  |  |  | 0.47 |  |  | 0.55 |
| employed |  | 79.00 (73.83%) | 42.00 (77.78%) | 37.00 (69.81%) |  |  |  |  |
| no job |  | 28.00 (26.17%) | 12.00 (22.22%) | 16.00 (30.19%) |  |  |  |  |
| **ITAQDegree, n (%)** | 107 | 86.00 (80.37%) | 46.00 (85.19%) | 40.00 (75.47%) | 0.31 |  |  | 0.46 |
| **bprsDegree, n (%)** | 107 | 2.00 (1.87%) | 0.00 (0.00%) | 2.00 (3.77%) | 0.47 |  |  | 0.55 |
| **Age, Mean(SD)** | 107 | 35.25(12.15) | 37.20(12.83) | 33.26(11.18) | 0.093 | 3.9 | -0.67, 8.6 | 0.25 |
| **Years of education, Mean(SD)** | 107 | 13.15(3.50) | 13.43(3.77) | 12.87(3.20) | 0.41 | 0.56 | -0.78, 1.9 | 0.51 |
| **Age of first onset,, Mean(SD)** | 107 | 25.57(10.39) | 26.56(10.89) | 24.57(9.87) | 0.32 | 2.0 | -2.0, 6.0 | 0.46 |
| **Total course of illness, Mean(SD)** | 107 | 8.55(7.96) | 9.70(8.76) | 7.39(6.94) | 0.13 | 2.3 | -0.72, 5.3 | 0.31 |
| **Total number of episodes, Mean(SD)** | 106 | 4.75(3.21) | 5.15(3.07) | 4.33(3.33) | 0.19 | 0.82 | -0.41, 2.1 | 0.41 |
| (Missing) |  | 1 | 0 | 1 |  |  |  |  |
| **Time from first onset to diagnosis, Mean(SD)** | 106 | 5.04(6.11) | 5.39(6.53) | 4.67(5.69) | 0.55 | 0.72 | -1.6, 3.1 | 0.61 |
| (Missing) |  | 1 | 0 | 1 |  |  |  |  |
| **Age of initial diagnosis, Mean(SD)** | 106 | 30.78(11.72) | 31.96(12.48) | 29.56(10.86) | 0.29 | 2.4 | -2.1, 6.9 | 0.46 |
| (Missing) |  | 1 | 0 | 1 |  |  |  |  |
| **Time from diagnosis to first treatment, Mean(SD)** | 106 | 3.26(5.19) | 3.84(5.55) | 2.66(4.78) | 0.24 | 1.2 | -0.82, 3.2 | 0.44 |
| (Missing) |  | 1 | 0 | 1 |  |  |  |  |
| **Total number of times in hospital, Mean(SD)** | 107 | 2.64(2.44) | 3.00(2.81) | 2.28(1.96) | 0.13 | 0.72 | -0.21, 1.6 | 0.31 |
| **HAMDSum, Mean(SD)** | 107 | 3.13(3.42) | 1.57(1.86) | 4.72(3.90) | <0.001 | -3.1 | -4.3, -2.0 | <0.001 |
| **YMRSSum, Mean(SD)** | 106 | 2.22(2.90) | 1.91(2.73) | 2.54(3.06) | 0.27 | -0.63 | -1.8, 0.49 | 0.44 |
| (Missing) |  | 1 | 0 | 1 |  |  |  |  |
| **ITAQSum, Mean(SD)** | 107 | 16.92(4.37) | 17.44(4.12) | 16.38(4.59) | 0.21 | 1.1 | -0.61, 2.7 | 0.42 |
| **BPRSSum, Mean(SD)** | 107 | 22.26(6.34) | 21.04(3.42) | 23.51(8.17) | 0.046 | -2.5 | -4.9, -0.05 | 0.14 |
| **MDQFactor1, Mean(SD)** | 107 | 1.68(1.82) | 1.52(1.40) | 1.85(2.17) | 0.35 | -0.33 | -1.0, 0.37 | 0.48 |
| **MDQFactor2, Mean(SD)** | 107 | 0.80(1.44) | 0.31(0.51) | 1.30(1.87) | <0.001 | -0.99 | -1.5, -0.46 | 0.002 |
| **MDQFactor3, Mean(SD)** | 107 | 0.88(0.98) | 0.37(0.65) | 1.40(0.99) | <0.001 | -1.0 | -1.3, -0.70 | <0.001 |
| **QIDSSum, Mean(SD)** | 107 | 6.20(5.03) | 2.63(1.78) | 9.83(4.66) | <0.001 | -7.2 | -8.6, -5.8 | <0.001 |
| **WHOQOLPHYS, Mean(SD)** | 107 | 13.26(2.07) | 14.16(1.81) | 12.33(1.91) | <0.001 | 1.8 | 1.1, 2.5 | <0.001 |
| **WHOQOLPSYCH, Mean(SD)** | 107 | 14.10(2.77) | 15.46(1.77) | 12.72(2.93) | <0.001 | 2.7 | 1.8, 3.7 | <0.001 |
| **WHOQOLSOCIL, Mean(SD)** | 107 | 13.60(2.98) | 14.91(2.33) | 12.25(2.98) | <0.001 | 2.7 | 1.6, 3.7 | <0.001 |
| **WHOQOLENVIR, Mean(SD)** | 107 | 13.77(2.39) | 14.65(2.23) | 12.87(2.22) | <0.001 | 1.8 | 0.93, 2.6 | <0.001 |
| *1* Median (SD) OR n(Frequency) | | | | | | | | |
| *2* Pearson’s Chi-squared test; Welch Two Sample t-test | | | | | | | | |
| *3* CI = Confidence Interval | | | | | | | | |
| *4* False discovery rate correction for multiple testing | | | | | | | | |
